# Supplementary material for: Fabrication of a cubic zirconia nanocoating on a titanium dental implant with excellent adhesion, hardness and biocompatibility
Source: Royal Society of Chemistry journal article supplement (doi:10.1039/c6ra10661g), 2016-01-01
Supplement: c6ra10661g1.pdf [file c6ra10661g1.pdf]

Electronic Supplementary Information (ESI)

## Fabrication of cubic zirconia nanocoating on the titanium dental implant with excellent adhesion, hardness and biocompatibility†

Indranee Das,<sup>a</sup> Shreyasi Chattopadhyay,<sup>a</sup> Arnab Mahato,<sup>b</sup> Biswanath Kundu<sup>b</sup> and Goutam De<sup>\*a</sup>

<sup>a</sup>Nano-Structured Materials Division, CSIR-Central Glass and Ceramic Research Institute, Kolkata 700032, India.

E-mail: [gde@cgcric.res.in](mailto:gde@cgcric.res.in)

<sup>b</sup>Bioceramics and Coating Division, CSIR-Central Glass and Ceramic Research Institute, Kolkata 700032, India.

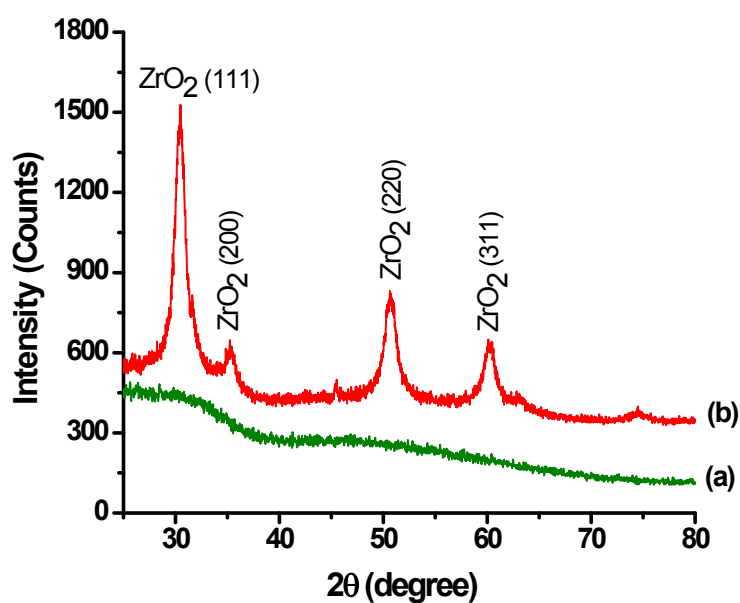

**Fig. S1** GIXRD patterns of (a) dried (70 °C) 3L-ZrO<sub>2</sub> coating on glass showing the amorphous nature. (b) The same heat-treated (350 °C/10 h) coating with crystalline peaks for cubic ZrO<sub>2</sub> phase.

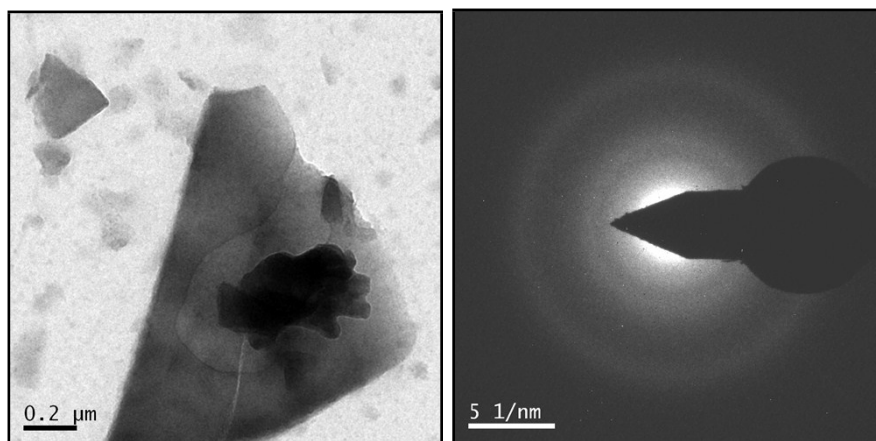

**Fig. S2** TEM image and SAED pattern of the dried (70 °C) ZrO<sub>2</sub> nanocoating material.
